# Supplementary material
Source: PubMed Central journal article supplement (PMC3545350)
Supplement: Supp_Fig2.pdf [file Supp_Fig2.pdf]

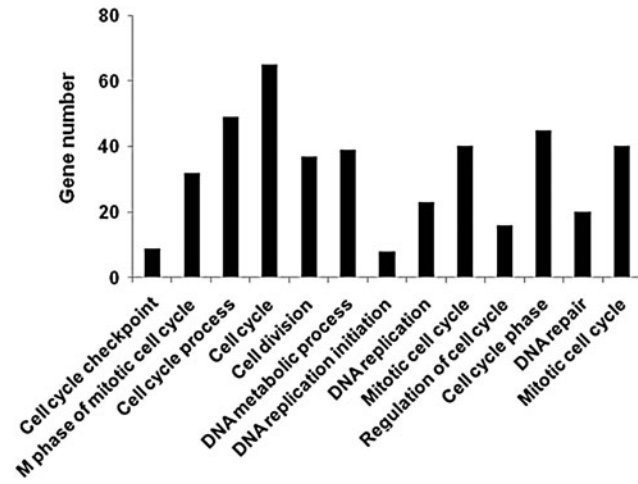

**SUPPLEMENTARY FIG. S2.** Distribution of upregulated genes in immortalized MSCs compared with primary MSCs based on GO analysis.
