# Supplementary material
Source: PubMed Central journal article supplement (PMC3545350)
Supplement: Supp_Table1.pdf [file Supp_Table1.pdf]

SUPPLEMENTARY TABLE S1. TOP 20 UPREGULATED GENES IN IMMORTALIZED MESENCHYMAL STEM CELLS COMPARED WITH PRIMARY MESENCHYMAL STEM CELLS

| <i>Accession</i> | <i>Symbol</i>   | <i>Fold</i> | <i>Definition</i>                                                                                                            |
|------------------|-----------------|-------------|------------------------------------------------------------------------------------------------------------------------------|
| NM_005045.2      | <i>RELN</i>     | 24.74       | <i>Homo sapiens</i> reelin ( <i>RELN</i> ), transcript variant 1, mRNA.                                                      |
| NM_201636.1      | <i>TBXA2R</i>   | 24.29       | <i>Homo sapiens</i> thromboxane A2 receptor ( <i>TBXA2R</i> ), transcript variant 1, mRNA.                                   |
| NM_000519.3      | <i>HBD</i>      | 19.34       | <i>Homo sapiens</i> hemoglobin, delta ( <i>HBD</i> ), mRNA.                                                                  |
| NM_001032409.1   | <i>OAS1</i>     | 17.25       | <i>Homo sapiens</i> 2',5'-oligoadenylate synthetase 1, 40/46 kDa ( <i>OAS1</i> ), transcript variant 3, mRNA.                |
| NM_013261.2      | <i>PPARGC1A</i> | 16.9        | <i>Homo sapiens</i> peroxisome proliferative activated receptor, gamma, coactivator 1, alpha ( <i>PPARGC1A</i> ), mRNA.      |
| NM_022168.2      | <i>IFIH1</i>    | 16.33       | <i>Homo sapiens</i> interferon induced with helicase C domain 1 ( <i>IFIH1</i> ), mRNA.                                      |
| NM_002780.3      | <i>PSG4</i>     | 16.01       | <i>Homo sapiens</i> pregnancy specific beta-1-glycoprotein 4 ( <i>PSG4</i> ), transcript variant 1, mRNA.                    |
| NM_002462.2      | <i>MX1</i>      | 15.22       | <i>Homo sapiens</i> myxovirus (influenza virus) resistance 1, interferon-inducible protein p78 (mouse) ( <i>MX1</i> ), mRNA. |
| NM_000361.2      | <i>THBD</i>     | 13.3        | <i>Homo sapiens</i> thrombomodulin ( <i>THBD</i> ), mRNA.                                                                    |
| NM_022836.2      | <i>DCLRE1B</i>  | 13.29       | <i>Homo sapiens</i> DNA cross-link repair 1B ( <i>PSO2</i> homolog, <i>S. cerevisiae</i> ) ( <i>DCLRE1B</i> ), mRNA.         |
| NM_033260.2      | <i>FOXQ1</i>    | 12.16       | <i>Homo sapiens</i> forkhead box Q1 ( <i>FOXQ1</i> ), mRNA.                                                                  |
| NM_009587.2      | <i>LGALS9</i>   | 12.08       | <i>Homo sapiens</i> lectin, galactoside-binding, soluble, 9 (galectin 9) ( <i>LGALS9</i> ), transcript variant long, mRNA.   |
| NM_019619.2      | <i>PARD3</i>    | 11.32       | <i>Homo sapiens</i> par-3 partitioning defective 3 homolog ( <i>C. elegans</i> ) ( <i>PARD3</i> ), mRNA.                     |
| NM_005492.2      | <i>CST8</i>     | 10.48       | <i>Homo sapiens</i> cystatin 8 (cystatin-related epididymal specific) ( <i>CST8</i> ), mRNA.                                 |
| NM_003353.2      | <i>UCN</i>      | 10.41       | <i>Homo sapiens</i> urocortin ( <i>UCN</i> ), mRNA.                                                                          |
| NM_001031683.1   | <i>IFIT3</i>    | 10.1        | <i>Homo sapiens</i> interferon-induced protein with tetratricopeptide repeats 3 ( <i>IFIT3</i> ), mRNA.                      |
| NM_004522.1      | <i>KIF5C</i>    | 9.92        | <i>Homo sapiens</i> kinesin family member 5C ( <i>KIF5C</i> ), mRNA.                                                         |
| NM_173555.1      | <i>TYSND1</i>   | 9.23        | <i>Homo sapiens</i> trypsin domain containing 1 ( <i>TYSND1</i> ), mRNA.                                                     |
| NM_002985.2      | <i>CCL5</i>     | 8.914       | <i>Homo sapiens</i> chemokine (C-C motif) ligand 5 ( <i>CCL5</i> ), mRNA.                                                    |
