# Supplementary material
Source: PubMed Central journal article supplement (PMC3545350)
Supplement: Supp_Table2.pdf [file Supp_Table2.pdf]

SUPPLEMENTARY TABLE S2. TOP 20 DOWNREGULATED GENES IN IMMORTALIZED MESENCHYMAL STEM CELLS COMPARED WITH PRIMARY MESENCHYMAL STEM CELLS

| <i>Accession</i> | <i>Symbol</i>    | <i>Fold</i> | <i>Definition</i>                                                                                                                |
|------------------|------------------|-------------|----------------------------------------------------------------------------------------------------------------------------------|
| NM_201625.1      | <i>CLEC12A</i>   | 18.82       | <i>Homo sapiens</i> C-type lectin domain family 12, member A (CLEC12A), transcript variant 3, mRNA.                              |
| NM_018012.2      | <i>KIF26B</i>    | 18.01       | <i>Homo sapiens</i> kinesin family member 26B (KIF26B), mRNA.                                                                    |
| NM_000546.2      | <i>TP53</i>      | 17.12       | <i>Homo sapiens</i> tumor protein p53 (Li-Fraumeni syndrome) (TP53), mRNA.                                                       |
| NM_001629.2      | <i>ALOX5AP</i>   | 13.39       | <i>Homo sapiens</i> arachidonate 5-lipoxygenase-activating protein (ALOX5AP), mRNA.                                              |
| NM_000600.1      | <i>IL6</i>       | 11.84       | <i>Homo sapiens</i> interleukin 6 (interferon, beta 2) (IL6), mRNA.                                                              |
| NM_182540.3      | <i>DDX26B</i>    | 11.59       | <i>Homo sapiens</i> DEAD/H (Asp-Glu-Ala-Asp/His) box polypeptide 26B (DDX26B), mRNA.                                             |
| NM_004914.2      | <i>RAB36</i>     | 10.97       | <i>Homo sapiens</i> RAB36, member RAS oncogene family (RAB36), mRNA.                                                             |
| NM_001080393.1   | <i>LOC727936</i> | 10.83       | <i>Homo sapiens</i> glycosyltransferase 8 domain containing 4 (GLT8D4), mRNA.                                                    |
| NM_006849.1      | <i>PDIA2</i>     | 10.69       | <i>Homo sapiens</i> protein disulfide isomerase family A, member 2 (PDIA2), mRNA.                                                |
| NR_002203.1      | <i>FTHL8</i>     | 10.55       | <i>Homo sapiens</i> ferritin, heavy polypeptide-like 8 (FTHL8) on chromosome X.                                                  |
| NM_014279.2      | <i>OLFM1</i>     | 10.51       | <i>Homo sapiens</i> olfactomedin 1 (OLFM1), transcript variant 1, mRNA.                                                          |
| NM_206966.1      | <i>MGC23985</i>  | 10.2        | <i>Homo sapiens</i> similar to AVLV472 (MGC23985), mRNA.                                                                         |
| NM_153763.1      | <i>KCNC4</i>     | 7.304       | <i>Homo sapiens</i> potassium voltage-gated channel, Shaw-related subfamily, member 4 (KCNC4), transcript variant 2, mRNA.       |
| NM_001018056.1   | <i>VLDLR</i>     | 7.204       | <i>Homo sapiens</i> very low density lipoprotein receptor (VLDLR), transcript variant 2, mRNA.                                   |
| NM_003840.3      | <i>TNFRSF10D</i> | 6.962       | <i>Homo sapiens</i> tumor necrosis factor receptor superfamily, member 10d, decoy with truncated death domain (TNFRSF10D), mRNA. |
| NM_014867.1      | <i>KBTBD11</i>   | 6.788       | <i>Homo sapiens</i> kelch repeat and BTB (POZ) domain containing 11 (KBTBD11), mRNA.                                             |
| NM_148903.1      | <i>GREB1</i>     | 6.735       | <i>Homo sapiens</i> GREB1 protein (GREB1), transcript variant c, mRNA.                                                           |
| NM_001011717.1   | <i>NMS</i>       | 6.707       | <i>Homo sapiens</i> neuromedin S (NMS), mRNA.                                                                                    |
| NM_020775.2      | <i>KIAA1324</i>  | 6.357       | <i>Homo sapiens</i> KIAA1324 (KIAA1324), mRNA.                                                                                   |
| NM_012211.3      | <i>ITGA11</i>    | 6.303       | <i>Homo sapiens</i> integrin, alpha 11 (ITGA11), transcript variant 2, mRNA.                                                     |
