# Supplementary material
Source: PubMed Central journal article supplement (PMC3545350)
Supplement: Supp_Table3.pdf [file Supp_Table3.pdf]

SUPPLEMENTARY TABLE S3. CELL CYCLE GENES UPREGULATED IN IMMORTALIZED MESENCHYMAL STEM CELLS COMPARED WITH CONTROL MESENCHYMAL STEM CELLS

| <i>Accession</i> | <i>Symbol</i>    | <i>Fold</i> | <i>Definition</i>                                                                                                          |
|------------------|------------------|-------------|----------------------------------------------------------------------------------------------------------------------------|
| NM_014622.4      | <b>LOH11CR2A</b> | 18.01       | <i>Homo sapiens</i> loss of heterozygosity, 11, chromosomal region 2, gene A (LOH11CR2A), transcript variant 1, mRNA.      |
| NM_031423.3      | <i>NUF2</i>      | 9.449       | <i>Homo sapiens</i> NUF2, NDC80 kinetochore complex component, homolog (S. cerevisiae) (NUF2), transcript variant 2, mRNA. |
| NM_019619.2      | <i>PARD3</i>     | 8.591       | <i>Homo sapiens</i> par-3 partitioning defective 3 homolog (C. elegans) (PARD3), mRNA.                                     |
| NM_003579.2      | <b>RAD54L</b>    | 8.471       | <i>Homo sapiens</i> RAD54-like (S. cerevisiae) (RAD54L), mRNA.                                                             |
| NM_052911.1      | <i>ESCO1</i>     | 7.309       | <i>Homo sapiens</i> establishment of cohesion 1 homolog 1 (S. cerevisiae) (ESCO1), mRNA.                                   |
| NM_033246.2      | <b>PML</b>       | 6.066       | <i>Homo sapiens</i> promyelocytic leukemia (PML), transcript variant 7, mRNA.                                              |
| NM_004091.2      | <i>E2F2</i>      | 6.038       | <i>Homo sapiens</i> E2F transcription factor 2 (E2F2), mRNA.                                                               |
| NM_181800.1      | <i>UBE2C</i>     | 5.848       | <i>Homo sapiens</i> ubiquitin-conjugating enzyme E2C (UBE2C), transcript variant 3, mRNA.                                  |
| NM_018492.2      | <i>PBK</i>       | 5.601       | <i>Homo sapiens</i> PDZ binding kinase (PBK), mRNA.                                                                        |
| NM_004217.1      | <i>AURKB</i>     | 5.241       | <i>Homo sapiens</i> aurora kinase B (AURKB), mRNA.                                                                         |
| NM_001790.3      | <b>CDC25C</b>    | 4.804       | <i>Homo sapiens</i> cell division cycle 25 homolog C (S. pombe) (CDC25C), transcript variant 1, mRNA.                      |
| NM_152524.3      | <i>SGOL2</i>     | 4.711       | <i>Homo sapiens</i> shugoshin-like 2 (S. pombe) (SGOL2), mRNA.                                                             |
| NM_001255.1      | <b>CDC20</b>     | 4.681       | <i>Homo sapiens</i> CDC20 cell division cycle 20 homolog (S. cerevisiae) (CDC20), mRNA.                                    |
| NM_018131.3      | <b>CEP55</b>     | 4.643       | <i>Homo sapiens</i> centrosomal protein 55 kDa (CEP55), mRNA.                                                              |
| NM_002263.2      | <b>KIFC1</b>     | 4.635       | <i>Homo sapiens</i> kinesin family member C1 (KIFC1), mRNA.                                                                |
| NM_002417.2      | <i>MKI67</i>     | 4.499       | <i>Homo sapiens</i> antigen identified by monoclonal antibody Ki-67 (MKI67), mRNA.                                         |
| NM_003504.3      | <b>CDC45L</b>    | 4.491       | <i>Homo sapiens</i> CDC45 cell division cycle 45-like (S. cerevisiae) (CDC45L), mRNA.                                      |
| NM_004219.2      | <b>PTTG1</b>     | 4.42        | <i>Homo sapiens</i> pituitary tumor-transforming 1 (PTTG1), mRNA.                                                          |
| NM_001789.2      | <b>CDC25A</b>    | 4.358       | <i>Homo sapiens</i> cell division cycle 25A (CDC25A), transcript variant 1, mRNA.                                          |
| NM_181803.1      | <b>UBE2C</b>     | 4.225       | <i>Homo sapiens</i> ubiquitin-conjugating enzyme E2C (UBE2C), transcript variant 6, mRNA.                                  |
| NM_031966.2      | <b>CCNB1</b>     | 4.162       | <i>Homo sapiens</i> cyclin B1 (CCNB1), mRNA.                                                                               |
| NM_005192.2      | <b>CDKN3</b>     | 4.113       | <i>Homo sapiens</i> cyclin-dependent kinase inhibitor 3 (CDK2-associated dual specificity phosphatase) (CDKN3), mRNA.      |
| NM_004523.2      | <i>KIF11</i>     | 4.09        | <i>Homo sapiens</i> kinesin family member 11 (KIF11), mRNA.                                                                |
| NM_016359.2      | <b>NUSAP1</b>    | 3.989       | <i>Homo sapiens</i> nucleolar and spindle associated protein 1 (NUSAP1), transcript variant 1, mRNA.                       |
| NM_018136.2      | <i>ASPM</i>      | 3.935       | <i>Homo sapiens</i> asp (abnormal spindle)-like, microcephaly associated (Drosophila) (ASPM), mRNA.                        |
| NM_007301.2      | <i>BRCA1</i>     | 3.913       | <i>Homo sapiens</i> breast cancer 1, early onset (BRCA1), transcript variant BRCA1-delta15-17, mRNA.                       |
| NM_198434.1      | <b>AURKA</b>     | 3.895       | <i>Homo sapiens</i> aurora kinase A (AURKA), transcript variant 3, mRNA.                                                   |
| NM_016343.3      | <i>CENPF</i>     | 3.814       | <i>Homo sapiens</i> centromere protein F, 350/400ka (mitosin) (CENPF), mRNA.                                               |
| NM_016426.4      | <b>GTSE1</b>     | 3.698       | <i>Homo sapiens</i> G-2 and S-phase expressed 1 (GTSE1), mRNA.                                                             |
| NM_016195.2      | <i>MPHOSPH1</i>  | 3.651       | <i>Homo sapiens</i> M-phase phosphoprotein 1 (MPHOSPH1), mRNA.                                                             |
| NM_080668.2      | <b>CDCA5</b>     | 3.628       | <i>Homo sapiens</i> cell division cycle associated 5 (CDCA5), mRNA.                                                        |
| NM_182776.1      | <b>MCM7</b>      | 3.608       | <i>Homo sapiens</i> minichromosome maintenance complex component 7 (MCM7), transcript variant 2, mRNA.                     |
| NM_012112.4      | <i>TPX2</i>      | 3.597       | <i>Homo sapiens</i> TPX2, microtubule-associated, homolog (Xenopus laevis) (TPX2), mRNA.                                   |
| NM_001012413.1   | <b>SGOL1</b>     | 3.533       | <i>Homo sapiens</i> shugoshin-like 1 (S. pombe) (SGOL1), transcript variant C1, mRNA.                                      |
| NM_004701.2      | <b>CCNB2</b>     | 3.451       | <i>Homo sapiens</i> cyclin B2 (CCNB2), mRNA.                                                                               |
| NM_005563.3      | <i>STMN1</i>     | 3.371       | <i>Homo sapiens</i> stathmin 1/oncoprotein 18 (STMN1), transcript variant 3, mRNA.                                         |
| NM_198434.1      | <b>AURKA</b>     | 3.368       | <i>Homo sapiens</i> aurora kinase A (AURKA), transcript variant 3, mRNA.                                                   |
| NM_001827.1      | <i>CKS2</i>      | 3.287       | <i>Homo sapiens</i> CDC28 protein kinase regulatory subunit 2 (CKS2), mRNA.                                                |
| NM_001826.1      | <i>CKS1B</i>     | 3.27        | <i>Homo sapiens</i> CDC28 protein kinase regulatory subunit 1B (CKS1B), mRNA.                                              |
| NM_013277.2      | <b>RACGAP1</b>   | 3.224       | <i>Homo sapiens</i> Rac GTPase activating protein 1 (RACGAP1), mRNA.                                                       |
| NM_020242.1      | <b>KIF15</b>     | 3.214       | <i>Homo sapiens</i> kinesin family member 15 (KIF15), mRNA.                                                                |
| NM_003981.2      | <b>PRC1</b>      | 3.21        | <i>Homo sapiens</i> protein regulator of cytokinesis 1 (PRC1), transcript variant 1, mRNA.                                 |
| NM_001012271.1   | <b>BIRC5</b>     | 3.172       | <i>Homo sapiens</i> baculoviral IAP repeat-containing 5 (survivin) (BIRC5), transcript variant 3, mRNA.                    |
| NM_002497.2      | <b>NEK2</b>      | 3.135       | <i>Homo sapiens</i> NIMA (never in mitosis gene a)-related kinase 2 (NEK2), mRNA.                                          |
| NM_000465.1      | <b>BARD1</b>     | 3.124       | <i>Homo sapiens</i> BRCA1 associated RING domain 1 (BARD1), mRNA.                                                          |
| NM_004358.3      | <b>CDC25B</b>    | 3.062       | <i>Homo sapiens</i> cell division cycle 25 homolog B (S. pombe) (CDC25B), transcript variant 2, mRNA.                      |

(continued)

SUPPLEMENTARY TABLE S3. (CONTINUED)

| <i>Accession</i> | <i>Symbol</i>        | <i>Fold</i> | <i>Definition</i>                                                                                                   |
|------------------|----------------------|-------------|---------------------------------------------------------------------------------------------------------------------|
| NM_018101.2      | <b><i>CDCA8</i></b>  | 3.034       | <i>Homo sapiens</i> cell division cycle associated 8 (CDCA8), mRNA.                                                 |
| NM_001237.2      | <b><i>CCNA2</i></b>  | 2.911       | <i>Homo sapiens</i> cyclin A2 (CCNA2), mRNA.                                                                        |
| NM_014708.3      | <b><i>KNTC1</i></b>  | 2.908       | <i>Homo sapiens</i> kinetochore associated 1 (KNTC1), mRNA.                                                         |
| NM_004526.2      | <b><i>MCM2</i></b>   | 2.835       | <i>Homo sapiens</i> MCM2 minichromosome maintenance deficient 2, mitotin ( <i>S. cerevisiae</i> ) (MCM2), mRNA.     |
| NM_033379.2      | <b><i>CDC2</i></b>   | 2.754       | <i>Homo sapiens</i> cell division cycle 2, G1 to S and G2 to M (CDC2), transcript variant 2, mRNA.                  |
| NM_001761.1      | <b><i>CCNF</i></b>   | 2.735       | <i>Homo sapiens</i> cyclin F (CCNF), mRNA.                                                                          |
| NM_004856.4      | <b><i>KIF23</i></b>  | 2.729       | <i>Homo sapiens</i> kinesin family member 23 (KIF23), transcript variant 2, mRNA.                                   |
| NM_001798.2      | <b><i>CDK2</i></b>   | 2.682       | <i>Homo sapiens</i> cyclin-dependent kinase 2 (CDK2), transcript variant 1, mRNA.                                   |
| NM_006231.2      | <b><i>POLE</i></b>   | 2.616       | <i>Homo sapiens</i> polymerase (DNA directed), epsilon (POLE), mRNA.                                                |
| NM_015895.3      | <b><i>GMNN</i></b>   | 2.419       | <i>Homo sapiens</i> geminin, DNA replication inhibitor (GMNN), mRNA.                                                |
| NM_002388.3      | <b><i>MCM3</i></b>   | 2.311       | <i>Homo sapiens</i> MCM3 minichromosome maintenance deficient 3 ( <i>S. cerevisiae</i> ) (MCM3), mRNA.              |
| NM_005132.1      | <b><i>REC8L1</i></b> | 2.25        | <i>Homo sapiens</i> REC8-like 1 (yeast) (REC8L1), mRNA.                                                             |
| NM_012222.1      | <b><i>MUTYH</i></b>  | 2.19        | <i>Homo sapiens</i> mutY homolog ( <i>E. coli</i> ) (MUTYH), mRNA.                                                  |
| NM_001274.2      | <b><i>CHEK1</i></b>  | 2.111       | <i>Homo sapiens</i> CHK1 checkpoint homolog ( <i>S. pombe</i> ) (CHEK1), mRNA.                                      |
| NM_001070.3      | <b><i>TUBG1</i></b>  | 2.098       | <i>Homo sapiens</i> tubulin, gamma 1 (TUBG1), mRNA.                                                                 |
| NM_181799.1      | <b><i>UBE2C</i></b>  | 2.051       | <i>Homo sapiens</i> ubiquitin-conjugating enzyme E2C (UBE2C), transcript variant 2, mRNA.                           |
| NM_002198.1      | <b><i>IRF1</i></b>   | 2.019       | <i>Homo sapiens</i> interferon regulatory factor 1 (IRF1), mRNA.                                                    |
| NM_001800.3      | <b><i>CDKN2D</i></b> | 2.006       | <i>Homo sapiens</i> cyclin-dependent kinase inhibitor 2D (p19, inhibits CDK4) (CDKN2D), transcript variant 1, mRNA. |
| NM_005030.3      | <b><i>PLK1</i></b>   | 2.003       | <i>Homo sapiens</i> polo-like kinase 1 ( <i>Drosophila</i> ) (PLK1), mRNA.                                          |

Italic-nonbold gene symbols indicate common upregulated genes in p53 knockdown and immortalized MSCs compared with control MSCs. Italic-bold gene symbols indicate upregulated genes only in immortalized MSCs, but not in p53 knockdown MSCs compared with control MSCs.

MSCs, mesenchymal stem cells.
