# Supplementary material
Source: PubMed Central journal article supplement (PMC3545350)
Supplement: Supp_Table4.pdf [file Supp_Table4.pdf]

SUPPLEMENTARY TABLE S4. COMPARATIVE TABLE OF TOP MOLECULAR AND CELLULAR FUNCTION OF UPREGULATED GENES IN p53 KNOCKDOWN AND IMMORTALIZED MESENCHYMAL STEM CELLS WITH A HIGHER SIGNIFICANCE, OBTAINED BY INGENUITY PATHWAYS ANALYSIS

| <i>Category</i>                            | <i>p53KD MSCs</i> |                  | <i>p53KD + TERT MSCs</i> |                  |
|--------------------------------------------|-------------------|------------------|--------------------------|------------------|
|                                            | <i>P-value</i>    | <i>Molecules</i> | <i>P-value</i>           | <i>Molecules</i> |
| Cellular growth and proliferation          | 3.58E-07–1.05E-02 | 65               | 1.86E-08–4.26E-03        | 124              |
| Cell death                                 | 2.40E-06–1.05E-02 | 56               | —                        | —                |
| Cell cycle                                 | 3.59E-06–1.05E-02 | 33               | 2.24E-24–4.93E-03        | 94               |
| Cellular assembly and organization         | 1.74E-04–1.05E-02 | 21               | 4.76E-11–3.98E-03        | 52               |
| DNA replication, recombination, and repair | 1.91E-04–1.05E-02 | 24               | 1.53E-14–3.98E-03        | 94               |
| Cellular movement                          | —                 | —                | 9.10E-12–2.76E-03        | 33               |
