# Supplementary material
Source: PubMed Central journal article supplement (PMC3545350)

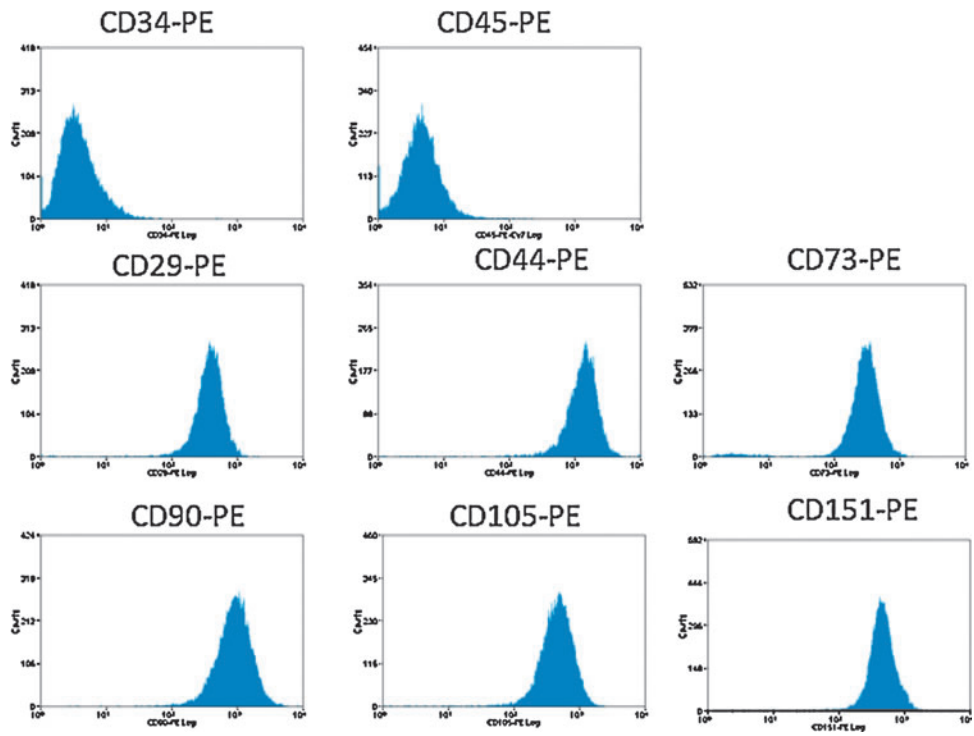

SUPPLEMENTARY FIG. S1. Surface antigen profile of parental primary mesenchymal stem cells (MSCs).

Supplement: Supp_Fig1.pdf [file Supp_Fig1.pdf]
